# Supplementary material for: Nitrate reduction capacity of the oral microbiota is impaired in periodontitis: potential implications for systemic nitric oxide availability
Source: bioRxiv or medRxiv preprint supplement (doi:10.1101/2023.06.21.23291703), 2023-06-29
Supplement: Supplementary file [file media-2.pdf]

## Correlations between bacterial groups

BL and D90 (max. N = 84)

| y                 | x                 | spearman.cor       | cor.adj.p.val      | cor.p.val   |
|-------------------|-------------------|--------------------|--------------------|-------------|
| Nitrate_reducers  | Perio_assoc       | -0.522790321       | <b>8.62E-06</b>    | 5.15E-07    |
| Nitrate_reducers  | Red_compl         | -0.403655494       | <b>0.001420211</b> | 0.000140389 |
| Nitrite_producers | Nitrate_reducers  | <b>0.593317809</b> | <b>1.04E-07</b>    | 4.56E-09    |
| Nitrite_producers | Perio_assoc       | -0.251149134       | <b>0.097722375</b> | 0.021436081 |
| Nitrite_producers | Red_compl         | -0.313274838       | <b>0.022745794</b> | 0.003712532 |
| Perio_assoc       | Red_compl         | <b>0.719443449</b> | <b>4.58E-13</b>    | 1.26E-14    |
| Rothia_T_ng       | Nitrate_reducers  | <b>0.574460454</b> | <b>3.94E-06</b>    | 1.99E-07    |
| Rothia_T_ng       | Nitrite_producers | <b>0.425705762</b> | <b>0.002209841</b> | 0.000238764 |
| Rothia_T_ng       | Perio_assoc       | -0.284894453       | <b>0.080441156</b> | 0.01682792  |
| Rothia_T_ng       | Red_compl         | -0.259354513       | <b>0.118395385</b> | 0.030151759 |
| Rothia_Total      | Nitrate_reducers  | <b>0.597201552</b> | <b>1.00E-06</b>    | 4.84E-08    |
| Rothia_Total      | Nitrite_producers | <b>0.311003397</b> | <b>0.045465444</b> | 0.008779534 |
| Rothia_Total      | Perio_assoc       | -0.261427973       | <b>0.118035477</b> | 0.028811902 |
| Rothia_Total      | Red_compl         | -0.32253268        | <b>0.036535858</b> | 0.006467267 |
| Rothia_Total      | Rothia_T_ng       | <b>0.788322762</b> | <b>2.17E-14</b>    | 5.49E-16    |

BL (max. N = 42)

| y                    | x                    | spearman.cor       | cor.adj.p.val      | cor.p.val   |
|----------------------|----------------------|--------------------|--------------------|-------------|
| Nitrate_reducers_BL  | Perio_assoc_BL       | -0.320800583       | <b>0.221032424</b> | 0.038816055 |
| Nitrate_reducers_BL  | Red_compl_BL         | -0.390888489       | <b>0.0970076</b>   | 0.010481281 |
| Nitrite_producers_BL | Nitrate_reducers_BL  | <b>0.482699943</b> | <b>0.01908762</b>  | 0.001370069 |
| Nitrite_producers_BL | Perio_assoc_BL       | <b>0.065391783</b> | <b>0.872351649</b> | 0.679832664 |
| Nitrite_producers_BL | Red_compl_BL         | -0.313472788       | <b>0.241081517</b> | 0.04322841  |
| Perio_assoc_BL       | Red_compl_BL         | <b>0.431014951</b> | <b>0.048821978</b> | 0.004377143 |
| Rothia_T_ng_BL       | Nitrate_reducers_BL  | <b>0.457595071</b> | <b>0.059152197</b> | 0.005711247 |
| Rothia_T_ng_BL       | Nitrite_producers_BL | <b>0.334337139</b> | <b>0.258585595</b> | 0.049642202 |
| Rothia_T_ng_BL       | Perio_assoc_BL       | -0.058407452       | <b>0.894173062</b> | 0.738923955 |
| Rothia_T_ng_BL       | Red_compl_BL         | -0.133520143       | <b>0.764212568</b> | 0.444473057 |
| Rothia_Total_BL      | Nitrate_reducers_BL  | <b>0.597479083</b> | <b>0.003646264</b> | 0.00015088  |
| Rothia_Total_BL      | Nitrite_producers_BL | <b>0.324022935</b> | <b>0.2878775</b>   | 0.0575755   |
| Rothia_Total_BL      | Perio_assoc_BL       | -0.108760968       | <b>0.802477321</b> | 0.533994567 |
| Rothia_Total_BL      | Red_compl_BL         | -0.293313041       | <b>0.387283336</b> | 0.087250039 |
| Rothia_Total_BL      | Rothia_T_ng_BL       | <b>0.840202004</b> | <b>1.99E-08</b>    | 2.75E-10    |

D90 (max. N = 42)

| y                     | x                     | spearman.cor       | cor.adj.p.val      | cor.p.val   |
|-----------------------|-----------------------|--------------------|--------------------|-------------|
| Nitrate_reducers_D90  | Perio_assoc_D90       | -0.583664209       | <b>0.0029701</b>   | 6.83E-05    |
| Nitrate_reducers_D90  | Red_compl_D90         | -0.33753425        | <b>0.245770602</b> | 0.028811235 |
| Nitrite_producers_D90 | Nitrate_reducers_D90  | <b>0.689490317</b> | <b>6.90E-05</b>    | 1.11E-06    |
| Nitrite_producers_D90 | Perio_assoc_D90       | -0.435378008       | <b>0.064040795</b> | 0.004269386 |
| Nitrite_producers_D90 | Red_compl_D90         | -0.259178085       | <b>0.477018166</b> | 0.09743184  |
| Perio_assoc_D90       | Red_compl_D90         | <b>0.769194979</b> | <b>2.32E-07</b>    | 2.67E-09    |
| Rothia_T_ng_D90       | Nitrate_reducers_D90  | <b>0.615966387</b> | <b>0.004510784</b> | 0.000114066 |
| Rothia_T_ng_D90       | Nitrite_producers_D90 | <b>0.50952381</b>  | <b>0.044016666</b> | 0.002023755 |
| Rothia_T_ng_D90       | Perio_assoc_D90       | -0.420168067       | <b>0.143924889</b> | 0.012572749 |
| Rothia_T_ng_D90       | Red_compl_D90         | -0.353407073       | <b>0.294918813</b> | 0.037288585 |
| Rothia_Total_D90      | Nitrate_reducers_D90  | <b>0.564185168</b> | <b>0.012913469</b> | 0.000415606 |

|                  |                    |                     |                    |             |
|------------------|--------------------|---------------------|--------------------|-------------|
| Rothia_Total_D90 | Nitrite_producers_ | <b>0.226206318</b>  | <b>0.676641438</b> | 0.1913262   |
| Rothia_Total_D90 | Perio_assoc_D90    | <b>-0.318929898</b> | <b>0.390519154</b> | 0.061847192 |
| Rothia_Total_D90 | Red_compl_D90      | <b>-0.312901952</b> | <b>0.416005722</b> | 0.067221965 |
| Rothia_Total_D90 | Rothia_T_ng_D90    | <b>0.676097768</b>  | <b>0.000415631</b> | 8.29E-06    |

## Correlations between bacterial groups and clinical parameters

BL and D90 (max. N = 84)

| y    | x                 | spearman.cor        | cor.adj.p.val      | cor.p.val   |
|------|-------------------|---------------------|--------------------|-------------|
| FMBS | Nitrate_reducers  | <b>-0.226155588</b> | <b>0.135362092</b> | 0.038585976 |
| FMBS | Nitrite_producers | <b>-0.205502988</b> | <b>0.188757788</b> | 0.060749633 |
| FMBS | Perio_assoc       | <b>0.382402278</b>  | <b>0.002823591</b> | 0.000331042 |
| FMBS | Red_compl         | <b>0.399458481</b>  | <b>0.001579915</b> | 0.000167071 |
| FMBS | Rothia_T_ng       | <b>-0.32124293</b>  | <b>0.036870848</b> | 0.006696085 |
| FMBS | Rothia_Total      | <b>-0.329203174</b> | <b>0.031685648</b> | 0.005390202 |
| FMPS | Nitrate_reducers  | <b>-0.382510697</b> | <b>0.002823591</b> | 0.000329644 |
| FMPS | Nitrite_producers | <b>-0.27425066</b>  | <b>0.058606889</b> | 0.011586649 |
| FMPS | Perio_assoc       | <b>0.495976616</b>  | <b>2.50E-05</b>    | 1.61E-06    |
| FMPS | Red_compl         | <b>0.44868153</b>   | <b>0.000219226</b> | 1.86E-05    |
| FMPS | Rothia_T_ng       | <b>-0.258514484</b> | <b>0.118395385</b> | 0.030709287 |
| FMPS | Rothia_Total      | <b>-0.252174713</b> | <b>0.130880946</b> | 0.035202461 |
| PISA | Nitrate_reducers  | <b>-0.23417148</b>  | <b>0.1211786</b>   | 0.032035722 |
| PISA | Nitrite_producers | <b>-0.243384851</b> | <b>0.108488236</b> | 0.025688019 |
| PISA | Perio_assoc       | <b>0.444327449</b>  | <b>0.000256049</b> | 2.30E-05    |
| PISA | Red_compl         | <b>0.452383773</b>  | <b>0.000188383</b> | 1.56E-05    |
| PISA | Rothia_T_ng       | <b>-0.278283235</b> | <b>0.091990085</b> | 0.019666846 |
| PISA | Rothia_Total      | <b>-0.281502522</b> | <b>0.086229884</b> | 0.018237125 |
| CAL  | Nitrate_reducers  | <b>-0.057610335</b> | <b>0.823590277</b> | 0.602695269 |
| CAL  | Nitrite_producers | <b>-0.02426924</b>  | <b>0.939381976</b> | 0.826548289 |
| CAL  | Perio_assoc       | <b>0.149351504</b>  | <b>0.392663932</b> | 0.175119087 |
| CAL  | Red_compl         | <b>0.211138799</b>  | <b>0.180241675</b> | 0.053865328 |
| CAL  | Rothia_T_ng       | <b>0.074905515</b>  | <b>0.778849928</b> | 0.537705114 |
| CAL  | Rothia_Total      | <b>0.075558496</b>  | <b>0.77837845</b>  | 0.534155737 |
| PPD  | Nitrate_reducers  | <b>-0.137704786</b> | <b>0.434348499</b> | 0.211615737 |
| PPD  | Nitrite_producers | <b>-0.159180657</b> | <b>0.355918266</b> | 0.148094727 |
| PPD  | Perio_assoc       | <b>0.400164032</b>  | <b>0.001568718</b> | 0.000162281 |
| PPD  | Red_compl         | <b>0.37626552</b>   | <b>0.003510287</b> | 0.000419621 |
| PPD  | Rothia_T_ng       | <b>-0.105163695</b> | <b>0.624615633</b> | 0.386256564 |
| PPD  | Rothia_Total      | <b>-0.119304538</b> | <b>0.571434736</b> | 0.325253359 |
| PPD5 | Nitrate_reducers  | <b>-0.236270491</b> | <b>0.118395385</b> | 0.030484097 |
| PPD5 | Nitrite_producers | <b>-0.215306272</b> | <b>0.16589682</b>  | 0.049196988 |
| PPD5 | Perio_assoc       | <b>0.476512936</b>  | <b>6.26E-05</b>    | 4.61E-06    |
| PPD5 | Red_compl         | <b>0.459709154</b>  | <b>0.000135129</b> | 1.09E-05    |
| PPD5 | Rothia_T_ng       | <b>-0.145946856</b> | <b>0.45079263</b>  | 0.227987077 |
| PPD5 | Rothia_Total      | <b>-0.199682524</b> | <b>0.273502505</b> | 0.097454916 |

BL (max. N = 42)

| y       | x                  | spearman.cor        | cor.adj.p.val      | cor.p.val   |
|---------|--------------------|---------------------|--------------------|-------------|
| FMBS_BL | Nitrate_reducers_B | <b>-0.068428745</b> | <b>0.867129913</b> | 0.666765767 |
| FMBS_BL | Nitrite_producers_ | <b>-0.175531081</b> | <b>0.611680606</b> | 0.266180668 |
| FMBS_BL | Perio_assoc_BL     | <b>-0.108156333</b> | <b>0.791307394</b> | 0.495375455 |

|         |                    |                     |                    |             |
|---------|--------------------|---------------------|--------------------|-------------|
| FMBS_BL | Red_compl_BL       | <b>0.033336037</b>  | <b>0.949706459</b> | 0.833995097 |
| FMBS_BL | Rothia_T_ng_BL     | <b>-0.399411329</b> | <b>0.133196238</b> | 0.0174533   |
| FMBS_BL | Rothia_Total_BL    | <b>-0.3548557</b>   | <b>0.217278574</b> | 0.036462841 |
| FMPS_BL | Nitrate_reducers_B | <b>-0.281451516</b> | <b>0.335567724</b> | 0.070970645 |
| FMPS_BL | Nitrite_producers_ | <b>-0.336428217</b> | <b>0.203724043</b> | 0.029372799 |
| FMPS_BL | Perio_assoc_BL     | <b>0.085303081</b>  | <b>0.826894118</b> | 0.591181772 |
| FMPS_BL | Red_compl_BL       | <b>0.191725824</b>  | <b>0.574485428</b> | 0.223851503 |
| FMPS_BL | Rothia_T_ng_BL     | <b>-0.307142448</b> | <b>0.340017375</b> | 0.07269337  |
| FMPS_BL | Rothia_Total_BL    | <b>-0.25177437</b>  | <b>0.503043631</b> | 0.144552767 |
| PISA_BL | Nitrate_reducers_B | <b>-0.098452313</b> | <b>0.802477321</b> | 0.533793363 |
| PISA_BL | Nitrite_producers_ | <b>-0.320314399</b> | <b>0.221032424</b> | 0.03912528  |
| PISA_BL | Perio_assoc_BL     | <b>-0.040758447</b> | <b>0.929765522</b> | 0.797247218 |
| PISA_BL | Red_compl_BL       | <b>0.169828159</b>  | <b>0.612456498</b> | 0.28227099  |
| PISA_BL | Rothia_T_ng_BL     | <b>-0.352265566</b> | <b>0.221032424</b> | 0.037949902 |
| PISA_BL | Rothia_Total_BL    | <b>-0.281931028</b> | <b>0.434279745</b> | 0.100832768 |
| CAL_BL  | Nitrate_reducers_B | <b>-0.212867677</b> | <b>0.528850969</b> | 0.175384959 |
| CAL_BL  | Nitrite_producers_ | <b>-0.129892229</b> | <b>0.715075841</b> | 0.410963127 |
| CAL_BL  | Perio_assoc_BL     | <b>0.074467223</b>  | <b>0.85129758</b>  | 0.638248377 |
| CAL_BL  | Red_compl_BL       | <b>0.16780157</b>   | <b>0.617439481</b> | 0.288138425 |
| CAL_BL  | Rothia_T_ng_BL     | <b>-0.12970096</b>  | <b>0.774913702</b> | 0.457724175 |
| CAL_BL  | Rothia_Total_BL    | <b>-0.120343305</b> | <b>0.791307394</b> | 0.49106671  |
| PPD_BL  | Nitrate_reducers_B | <b>-0.061193064</b> | <b>0.884001242</b> | 0.700260097 |
| PPD_BL  | Nitrite_producers_ | <b>-0.245906961</b> | <b>0.469102374</b> | 0.116466796 |
| PPD_BL  | Perio_assoc_BL     | <b>0.074323231</b>  | <b>0.85129758</b>  | 0.63994094  |
| PPD_BL  | Red_compl_BL       | <b>0.160707048</b>  | <b>0.637651283</b> | 0.309297519 |
| PPD_BL  | Rothia_T_ng_BL     | <b>-0.266377092</b> | <b>0.480051471</b> | 0.121917876 |
| PPD_BL  | Rothia_Total_BL    | <b>-0.154590291</b> | <b>0.691649751</b> | 0.375239865 |
| PPD5_BL | Nitrate_reducers_B | <b>-0.015976001</b> | <b>0.986068128</b> | 0.920012441 |
| PPD5_BL | Nitrite_producers_ | <b>-0.230557208</b> | <b>0.497594551</b> | 0.141843044 |
| PPD5_BL | Perio_assoc_BL     | <b>0.102668106</b>  | <b>0.802477321</b> | 0.517632774 |
| PPD5_BL | Red_compl_BL       | <b>0.194385867</b>  | <b>0.574485428</b> | 0.217369228 |
| PPD5_BL | Rothia_T_ng_BL     | <b>-0.228860051</b> | <b>0.539488573</b> | 0.186030543 |
| PPD5_BL | Rothia_Total_BL    | <b>-0.08598121</b>  | <b>0.839495017</b> | 0.623349173 |

D90 (max. N = 42)

| y        | x                  | spearman.cor        | cor.adj.p.val      | cor.p.val   |
|----------|--------------------|---------------------|--------------------|-------------|
| FMBS_D90 | Nitrate_reducers_D | <b>-0.093792089</b> | <b>0.861014379</b> | 0.554652322 |
| FMBS_D90 | Nitrite_producers_ | <b>-0.002030132</b> | <b>0.996576089</b> | 0.989819505 |
| FMBS_D90 | Perio_assoc_D90    | <b>0.048154726</b>  | <b>0.936511215</b> | 0.762014902 |
| FMBS_D90 | Red_compl_D90      | <b>0.14989249</b>   | <b>0.794572492</b> | 0.343401445 |
| FMBS_D90 | Rothia_T_ng_D90    | <b>-0.091867235</b> | <b>0.887579612</b> | 0.599675102 |
| FMBS_D90 | Rothia_Total_D90   | <b>-0.053733453</b> | <b>0.936511215</b> | 0.759172236 |
| FMPS_D90 | Nitrate_reducers_D | <b>-0.325206182</b> | <b>0.286774065</b> | 0.035599539 |
| FMPS_D90 | Nitrite_producers_ | <b>-0.100206995</b> | <b>0.861014379</b> | 0.527772807 |
| FMPS_D90 | Perio_assoc_D90    | <b>0.257211476</b>  | <b>0.478455557</b> | 0.100090703 |
| FMPS_D90 | Red_compl_D90      | <b>0.093301786</b>  | <b>0.861014379</b> | 0.55673294  |
| FMPS_D90 | Rothia_T_ng_D90    | <b>-0.027625881</b> | <b>0.970789295</b> | 0.874826216 |
| FMPS_D90 | Rothia_Total_D90   | <b>0.073837792</b>  | <b>0.921104743</b> | 0.67335933  |
| PISA_D90 | Nitrate_reducers_D | <b>-0.062234107</b> | <b>0.928293728</b> | 0.695404558 |
| PISA_D90 | Nitrite_producers_ | <b>-0.015396459</b> | <b>0.973543364</b> | 0.922905185 |

|          |                    |                     |                    |             |
|----------|--------------------|---------------------|--------------------|-------------|
| PISA_D90 | Perio_assoc_D90    | <b>0.104533852</b>  | <b>0.861014379</b> | 0.510010885 |
| PISA_D90 | Red_compl_D90      | <b>0.192719388</b>  | <b>0.6814576</b>   | 0.221414903 |
| PISA_D90 | Rothia_T_ng_D90    | <b>-0.020869809</b> | <b>0.973543364</b> | 0.905278331 |
| PISA_D90 | Rothia_Total_D90   | <b>0.04531447</b>   | <b>0.951257695</b> | 0.79603601  |
| CAL_D90  | Nitrate_reducers_D | <b>0.189951378</b>  | <b>0.6814576</b>   | 0.228248869 |
| CAL_D90  | Nitrite_producers_ | <b>0.159157213</b>  | <b>0.757592612</b> | 0.314047956 |
| CAL_D90  | Perio_assoc_D90    | <b>-0.114505673</b> | <b>0.861014379</b> | 0.470253415 |
| CAL_D90  | Red_compl_D90      | <b>-0.000371582</b> | <b>0.998704843</b> | 0.998136582 |
| CAL_D90  | Rothia_T_ng_D90    | <b>0.382406503</b>  | <b>0.216412145</b> | 0.023382462 |
| CAL_D90  | Rothia_Total_D90   | <b>0.475169855</b>  | <b>0.060893457</b> | 0.003919579 |
| PPD_D90  | Nitrate_reducers_D | <b>0.084704552</b>  | <b>0.887579612</b> | 0.593796953 |
| PPD_D90  | Nitrite_producers_ | <b>0.131960775</b>  | <b>0.835804401</b> | 0.404818396 |
| PPD_D90  | Perio_assoc_D90    | <b>0.114776694</b>  | <b>0.861014379</b> | 0.469196372 |
| PPD_D90  | Red_compl_D90      | <b>0.181169635</b>  | <b>0.6814576</b>   | 0.250880754 |
| PPD_D90  | Rothia_T_ng_D90    | <b>0.291538257</b>  | <b>0.4666446</b>   | 0.089269845 |
| PPD_D90  | Rothia_Total_D90   | <b>0.283642738</b>  | <b>0.477018166</b> | 0.098693414 |
| PPD5_D90 | Nitrate_reducers_D | <b>-0.053496232</b> | <b>0.930986494</b> | 0.736513823 |
| PPD5_D90 | Nitrite_producers_ | <b>0.027073321</b>  | <b>0.967131058</b> | 0.864859727 |
| PPD5_D90 | Perio_assoc_D90    | <b>0.208049936</b>  | <b>0.674680191</b> | 0.186118673 |
| PPD5_D90 | Red_compl_D90      | <b>0.284440653</b>  | <b>0.416005722</b> | 0.067899785 |
| PPD5_D90 | Rothia_T_ng_D90    | <b>0.192869587</b>  | <b>0.703844066</b> | 0.266975335 |
| PPD5_D90 | Rothia_Total_D90   | <b>0.040377424</b>  | <b>0.951257695</b> | 0.817862938 |

## Correlations between bacterial groups and plasma nitrite

BL and D90 (max. N = 84)

| y    | x                 | spearman.cor        | cor.adj.p.val      | cor.p.val   |
|------|-------------------|---------------------|--------------------|-------------|
| pNO2 | Nitrate_reducers  | <b>-0.137765902</b> | <b>0.437222579</b> | 0.217103625 |
| pNO2 | Nitrite_producers | <b>-0.202001513</b> | <b>0.209207079</b> | 0.068769625 |
| pNO2 | Perio_assoc       | <b>0.031007668</b>  | <b>0.937741483</b> | 0.78213161  |
| pNO2 | Red_compl         | <b>0.129362567</b>  | <b>0.471152269</b> | 0.246733917 |
| pNO2 | Rothia_T_ng       | <b>0.278777699</b>  | <b>0.097722375</b> | 0.021330512 |
| pNO2 | Rothia_Total      | <b>0.278293751</b>  | <b>0.097722375</b> | 0.021566317 |

BL (max. N = 42)

| y       | x                  | spearman.cor        | cor.adj.p.val      | cor.p.val   |
|---------|--------------------|---------------------|--------------------|-------------|
| pNO2_BL | Nitrate_reducers_B | <b>-0.144425087</b> | <b>0.686888064</b> | 0.366340301 |
| pNO2_BL | Nitrite_producers_ | <b>-0.103310105</b> | <b>0.802477321</b> | 0.519062165 |
| pNO2_BL | Perio_assoc_BL     | <b>-0.139198606</b> | <b>0.696172769</b> | 0.384084275 |
| pNO2_BL | Red_compl_BL       | <b>0.149193914</b>  | <b>0.677251318</b> | 0.351859305 |
| pNO2_BL | Rothia_T_ng_BL     | <b>0.104515242</b>  | <b>0.814884098</b> | 0.556369143 |
| pNO2_BL | Rothia_Total_BL    | <b>0.213270501</b>  | <b>0.574485428</b> | 0.225876973 |

D90 (max. N = 42)

| y        | x                  | spearman.cor        | cor.adj.p.val      | cor.p.val   |
|----------|--------------------|---------------------|--------------------|-------------|
| pNO2_D90 | Nitrate_reducers_D | <b>-0.127874564</b> | <b>0.835804401</b> | 0.424239828 |
| pNO2_D90 | Nitrite_producers_ | <b>-0.262020906</b> | <b>0.477018166</b> | 0.098007229 |
| pNO2_D90 | Perio_assoc_D90    | <b>0.123867596</b>  | <b>0.835804401</b> | 0.438999542 |
| pNO2_D90 | Red_compl_D90      | <b>0.146770682</b>  | <b>0.812480464</b> | 0.359824259 |
| pNO2_D90 | Rothia_T_ng_D90    | <b>0.438349885</b>  | <b>0.121952951</b> | 0.010092658 |
| pNO2_D90 | Rothia_Total_D90   | <b>0.34838414</b>   | <b>0.331732292</b> | 0.043468369 |

## Correlations between bacterial groups and salivary IL-1B

BL and D90 (max. N = 84)

| y                 | x    | spearman.cor        | cor.adj.p.val      | cor.p.val   |
|-------------------|------|---------------------|--------------------|-------------|
| Nitrate_reducers  | IL1B | <b>-0.230482907</b> | <b>0.13280017</b>  | 0.037448535 |
| Nitrite_producers | IL1B | <b>-0.335814804</b> | <b>0.014593769</b> | 0.002147129 |
| Perio_assoc       | IL1B | <b>0.194762791</b>  | <b>0.232347811</b> | 0.079585802 |
| Red_compl         | IL1B | <b>0.252328333</b>  | <b>0.09953968</b>  | 0.022196205 |
| Rothia_T_ng       | IL1B | <b>-0.17794192</b>  | <b>0.354209306</b> | 0.146569368 |
| Rothia_Total      | IL1B | <b>-0.168944691</b> | <b>0.389947687</b> | 0.16843577  |

BL (max. N = 42)

| y                    | x       | spearman.cor        | cor.adj.p.val      | cor.p.val   |
|----------------------|---------|---------------------|--------------------|-------------|
| Nitrate_reducers_BL  | IL1B_BL | <b>-0.261498258</b> | <b>0.429334259</b> | 0.098697531 |
| Nitrite_producers_BL | IL1B_BL | <b>-0.546689895</b> | <b>0.005642238</b> | 0.000272384 |
| Perio_assoc_BL       | IL1B_BL | <b>-0.019512195</b> | <b>0.982670666</b> | 0.903605211 |
| Red_compl_BL         | IL1B_BL | <b>0.149368206</b>  | <b>0.677251318</b> | 0.35129059  |
| Rothia_T_ng_BL       | IL1B_BL | <b>-0.309114525</b> | <b>0.344618173</b> | 0.07526144  |
| Rothia_Total_BL      | IL1B_BL | <b>-0.199083309</b> | <b>0.607592124</b> | 0.258995263 |

D90 (max. N = 42)

| y                     | x        | spearman.cor        | cor.adj.p.val      | cor.p.val   |
|-----------------------|----------|---------------------|--------------------|-------------|
| Nitrate_reducers_D90  | IL1B_D90 | <b>-0.133449477</b> | <b>0.835804401</b> | 0.404180959 |
| Nitrite_producers_D90 | IL1B_D90 | <b>-0.009581882</b> | <b>0.984770128</b> | 0.952798138 |
| Perio_assoc_D90       | IL1B_D90 | <b>0.166550523</b>  | <b>0.743098277</b> | 0.296862682 |
| Red_compl_D90         | IL1B_D90 | <b>0.160226137</b>  | <b>0.757592612</b> | 0.316969782 |
| Rothia_T_ng_D90       | IL1B_D90 | <b>0.008403361</b>  | <b>0.986634509</b> | 0.962851647 |
| Rothia_Total_D90      | IL1B_D90 | <b>-0.038658416</b> | <b>0.95368279</b>  | 0.828157824 |
